# Supplementary material
Source: Springer Nature journal article supplement (https://www.springermedizin.de/resource/supplementary/12967_2013_1843_MOESM2_ESM.pdf/9574946)

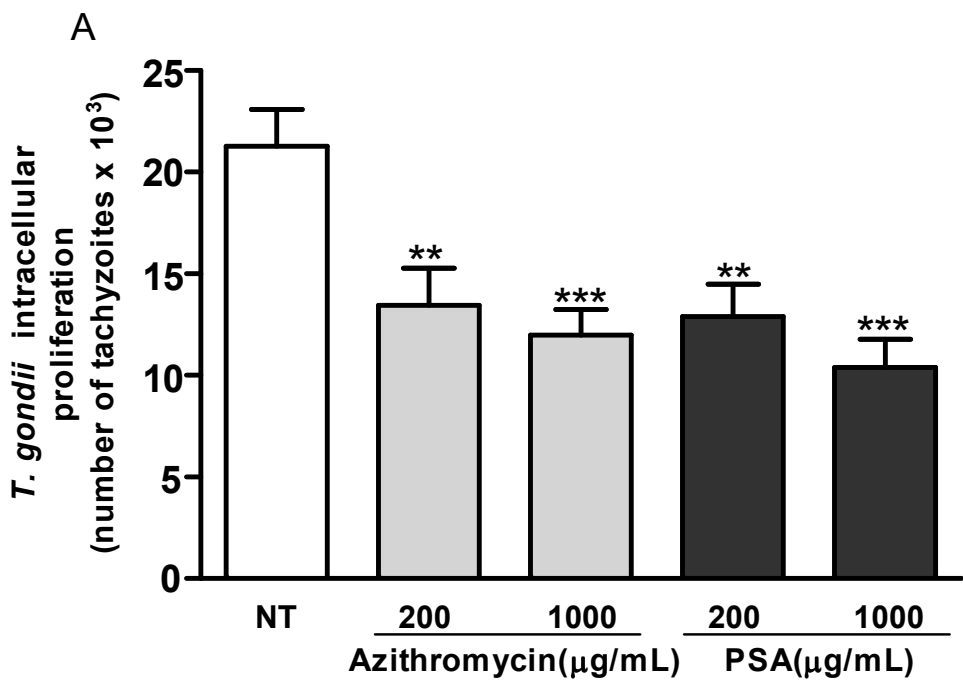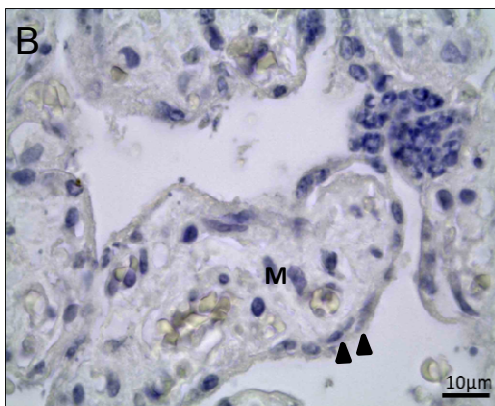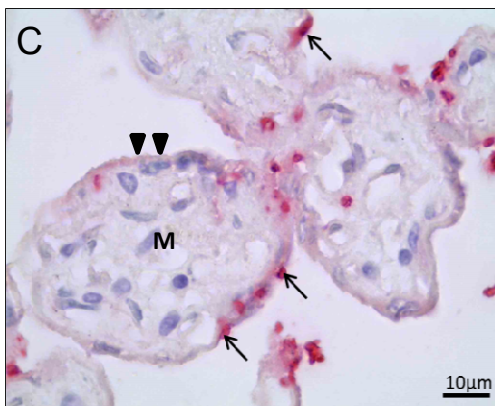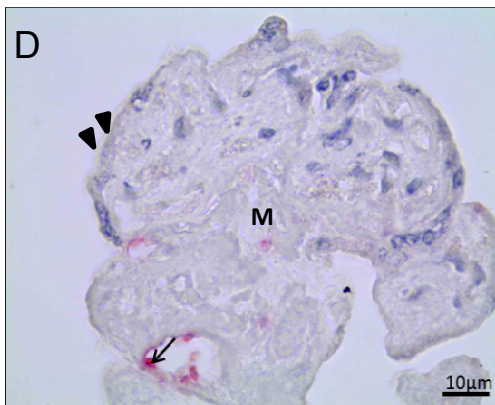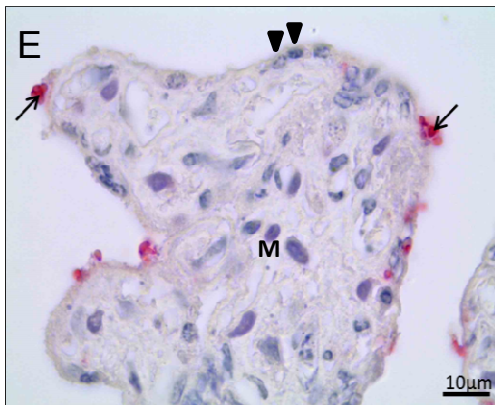

Supplement: MOESM2 [file 9574946]
